# Supplementary material for: Still and rotating myosin clusters determine cytokinetic ring constriction
Source: PubMed Central journal article supplement (PMC4932180; doi:10.1038/ncomms11860), 2016-07-01
Supplement: ncomms11860-s1.pdf [file ncomms11860-s1.pdf]

1 **Supplementary Figures**

2

**a**

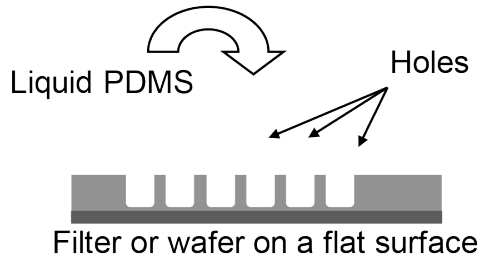

**b**

After curing and removal of stamp

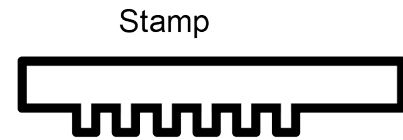

**c**

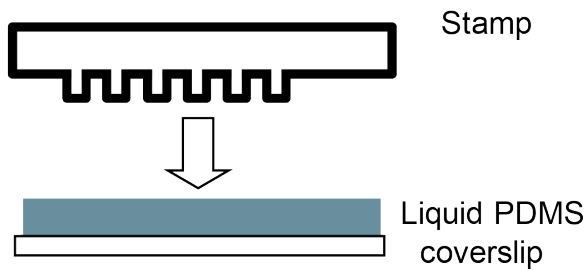

**d**

After curing and removal of stamp

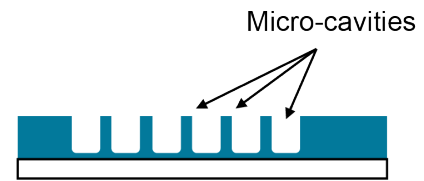

3

4

5 **Supplementary Figure 1. Microfabrication of micro-cavities**

6 **a**, Liquid PDMS is poured on the microstructured surface (filter or wafer).

7 **b**, The PDMS is degassed for 30 min, cured for 4h at 65°C. The stamp is cut out and can easily be

8 removed from the surface. **c**, Liquid PDMS is spin coated on plasma activated a glass coverslip

9 (#0). The stamp is silanized and carefully put on the PDMS. **d**, The PDMS is kept for about 1h at

10 room temperature to let gently air bubbles escape from the liquid PDMS. It is then cured for 4 h

11 at 65°C. The stamp is very carefully removed<sup>1</sup>.

12

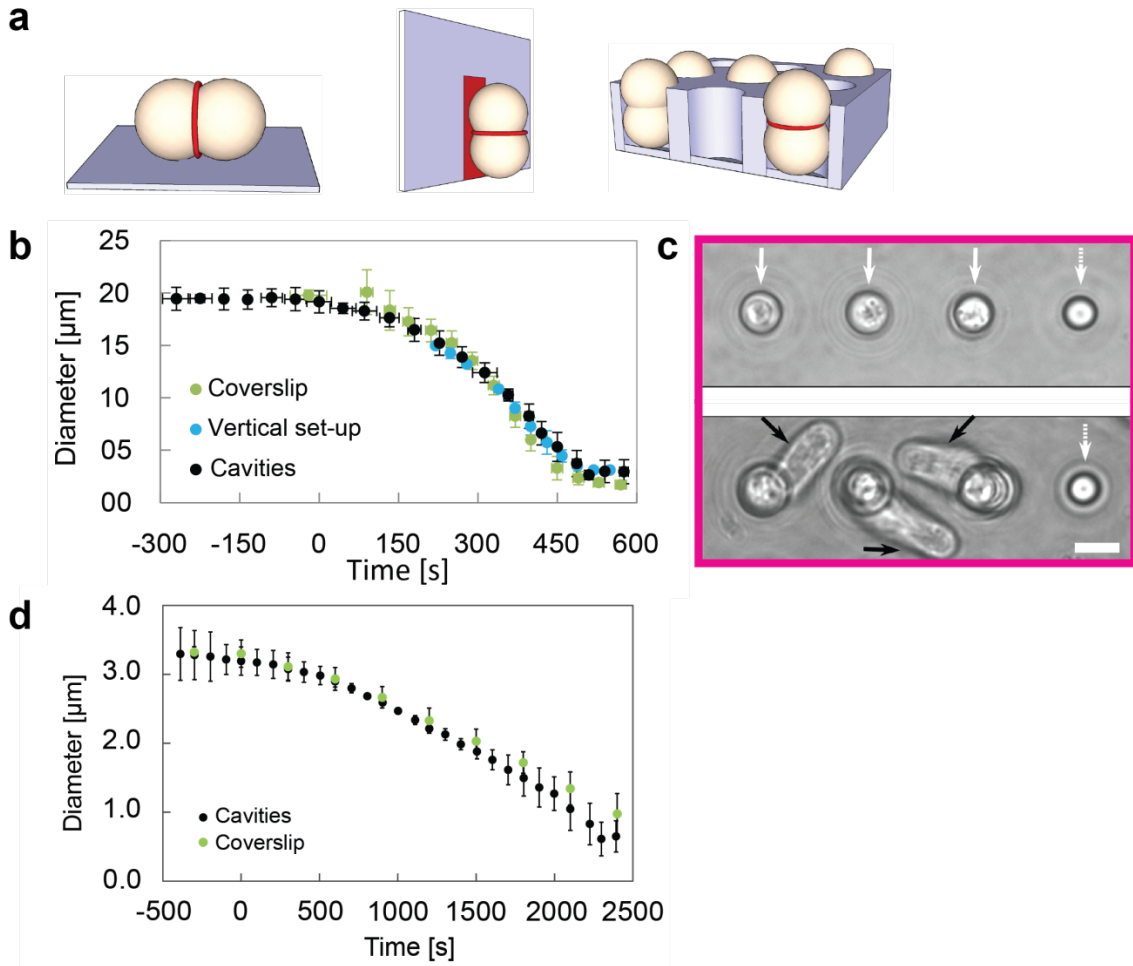

13

14

15 **Supplementary Figure 2. Comparison of micro-cavities with standard surfaces**

16 **a**, Schematic representation of the three set-ups and their comparison. Coverslip: Cell division on  
 17 untreated glass coverslips, Vertical set-up: Cell division on vertically oriented glass coverslips.  
 18 The coverslips are patterned with fibronectin lines, Cavities: Cells division in micro-cavities. **b**,  
 19 Constriction behavior of HeLa cells on coverslips (green), in the vertical setup (blue) and in  
 20 micro-cavities (black). Error bars indicate the standard deviation, coverslips: N = 12, vertical  
 21 setup: N = 6, micro-cavities: N = 18. **c**, Fission yeast cells grow normally in wells, white arrows  
 22 show cavities filled with cells and black arrows show sister cells after ~ 10 h of growth and  
 23 division (compare top and bottom panels). The dashed arrow points to an empty well<sup>1</sup>. Scale bar,  
 24 4 μm. **d**, Constriction behavior of fission yeast cells on coverslips (green) and in micro-cavities  
 25 (black). Error bars indicate the standard deviation, coverslips: N = 12, micro-cavities: N = 29.

26

27

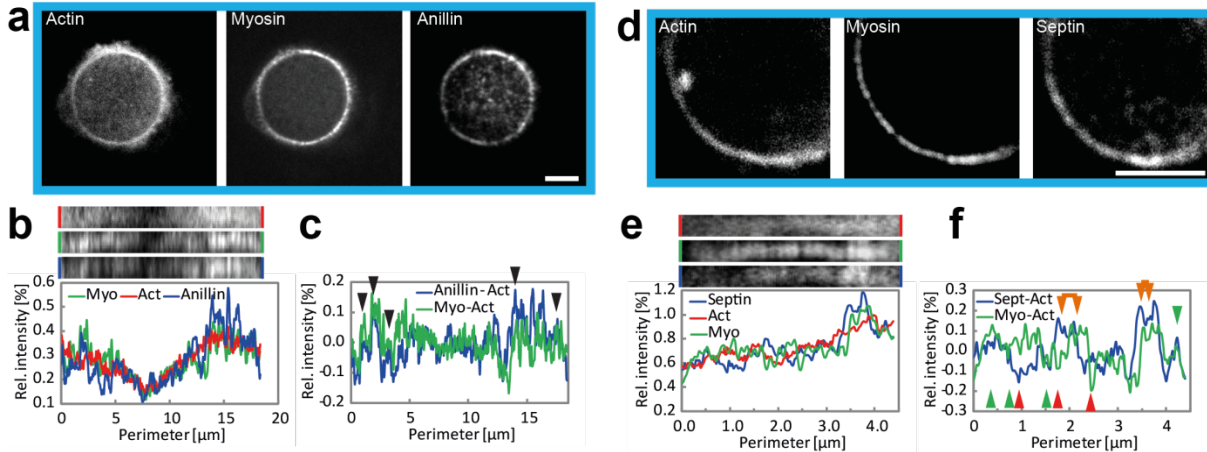

28

29

30 **Supplementary Figure 3. Anillin and septin in the cytokinetic ring of mammalian cells**

31 **a**, HeLa cells expressing LifeAct-mCherry and myosin-GFP stained for anillin. As myosin,  
 32 anillin shows clusters distribution. Smoothen with ImageJ, scale bar 5  $\mu\text{m}$ . **b**, Polar  
 33 transformation of the rings and the corresponding intensity spectra. The intensities are  
 34 normalized by their total intensity. Anillin and myosin profiles show peaks whereas actin  
 35 spectrum is rather flat. **c**, Anillin and myosin spectra are subtracted by the actin signal, to flatten  
 36 the profiles. Anillin and myosin show colocalization in some parts (arrows). **d**, HeLa cells  
 37 expressing LifeAct-mCherry and myosin-GFP stained for septin7. Septin profile reveals clusters.  
 38 Smoothen with ImageJ, scale bar 5  $\mu\text{m}$ . **e**, Polar transformation of the indicated part of the rings  
 39 and the corresponding intensity spectra. The intensities are normalized by their total intensity.  
 40 Septin and myosin show peaks whereas the actin spectrum is rather flat. **f**, Septin and myosin  
 41 spectra subtracted by the actin signal. Arrows indicate where profiles show colocalization  
 42 (green), anti-correlation (red) and a shift (orange).

43

44

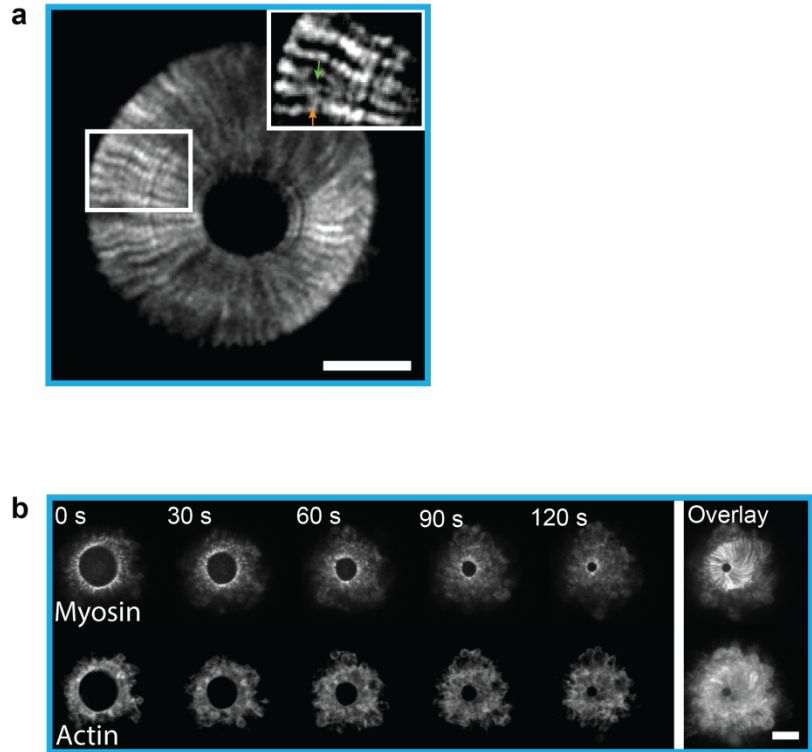

45

46

47 **Supplementary Figure 4. Movements of myosin clusters in mammalian cells**

48 **a-b**, Characteristics of clusters during ring closure. **a**, Overlay of rings in myosin. The clusters

49 undergo fusion. The inset shows cluster fusion (indicated by arrows). Scale bar, 5  $\mu\text{m}$ . **b**, Time

50 lapse series of ring closure in actin and myosin. The overlay of the time series shows the rotation

51 of the patterns/radial path of the clusters during constriction. Scale bar, 5  $\mu\text{m}$ .

52

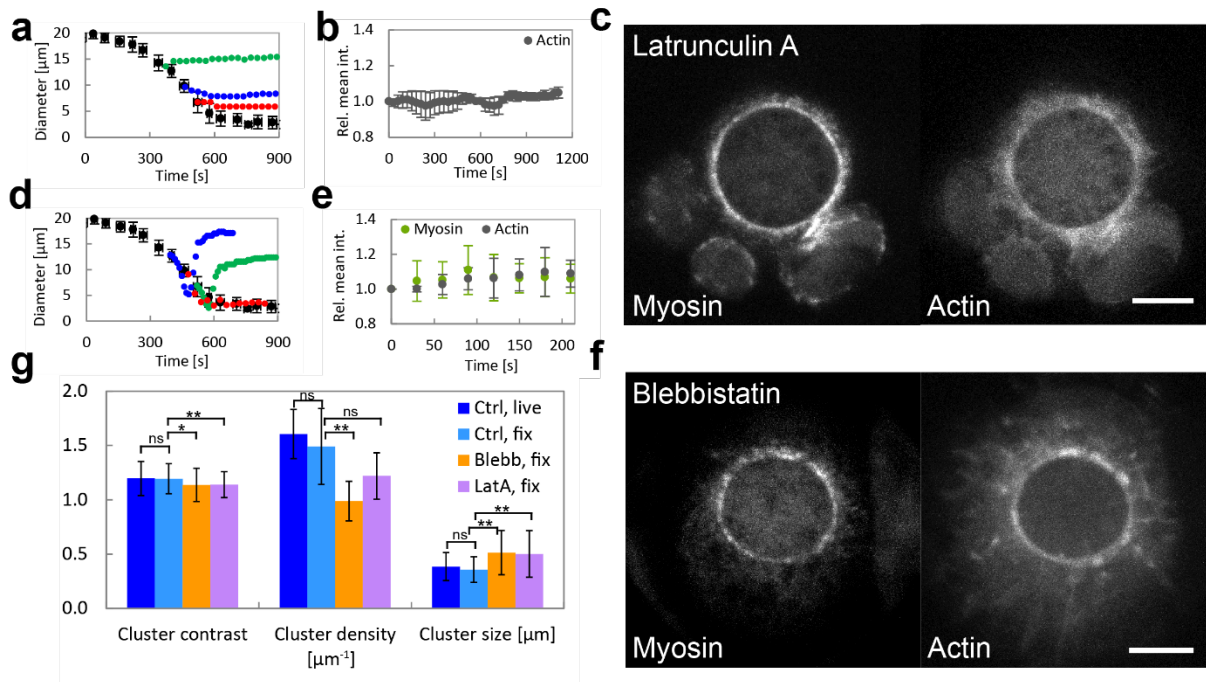

53

54 **Supplementary Figure 5. Effects of cytoskeleton drugs on the cytokinetic ring in**  
 55 **mammalian cells**

56 **a**, The constriction behaviors of three representative rings in the presence of 100  $\mu\text{M}$  blebbistatin  
 57 (in black without blebbistatin). Ring closure is stalled upon blebbistatin addition.

58 **b**, After incubation with 100  $\mu\text{M}$  blebbistatin the mean intensity of actin remains constant. Error  
 59 bars indicate the standard deviation, N = 6. **c,f**, Cells fixed after incubation with c) latrunculin A  
 60 (1.5  $\mu\text{M}$ , 3 min) and f) blebbistatin (100  $\mu\text{M}$ , 15 min). Scale bars 5  $\mu\text{m}$ .

61 **d**, Three representative constriction behavior after incubation with 1.5  $\mu\text{M}$  latrunculin A: the ring  
 62 continues to constrict in some cases (red); and opens in others (blue and green). In all cases the  
 63 constriction speed is faster after addition of the drug. **e**, With 1.5  $\mu\text{M}$  latrunculin A, myosin and  
 64 actin concentrations remain constant. Error bars indicate the standard deviation, N = 6. **g**, Mean  
 65 value of cluster contrast, density and size for cells treated with drugs and fixed and untreated  
 66 cells (Ctrl, live and fixed). Mean value for rings in the diameter range from 9  $\mu\text{m}$  to 12  $\mu\text{m}$   
 67 (Number of rings: N(Ctrl, live) = 16, N(Ctrl, fix) = 8, N(Lat A) = 9, N(Blebb) = 7, number of  
 68 measurements of cluster contrast and cluster size: between 88 and 211 per conditions, number of  
 69 measurements of cluster density: between 8 and 16 per condition). Mann-Whitney test was  
 70 performed, ns not significantly different (P > 0.05), \* significantly different (P < 0.05), \*\*  
 71 significantly different (P < 0.01). Error bars indicate the standard deviation.

72

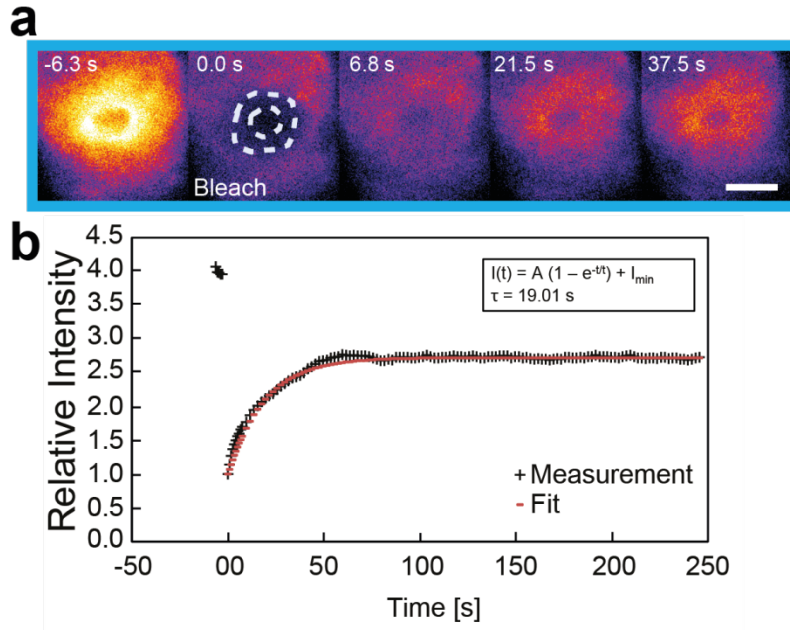

73

74

75 **Supplementary Figure 6. Myosin FRAP in mammalian ring**

76 **a**, FRAP experiment on myosin in the rings of HeLa cells. The entire ring is bleached. Scale bars

77 5  $\mu\text{m}$ . **b**, The recovery is not complete. Its half time is  $\sim 20 \text{ s}$ .

78

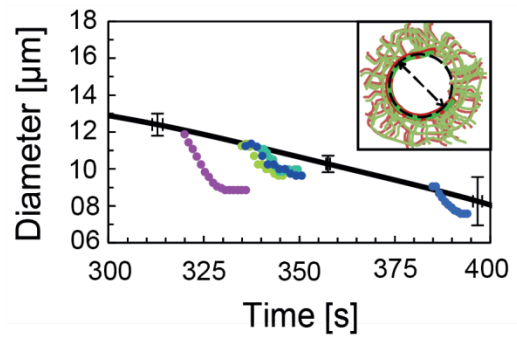

79

80

81 **Supplementary Figure 7. Constriction behaviors after ablation of the cytokinetic ring in**  
82 **mammalian cells**

83 Constriction behaviors after ablation of the cytokinetic ring in mammalian cells. The cut rings  
84 were fitted with a circle and their diameter measured as a function of time. The individual curves  
85 were aligned to the constriction curve of intact rings (Fig. 1e). The cut rings constrict faster than  
86 control rings.

87

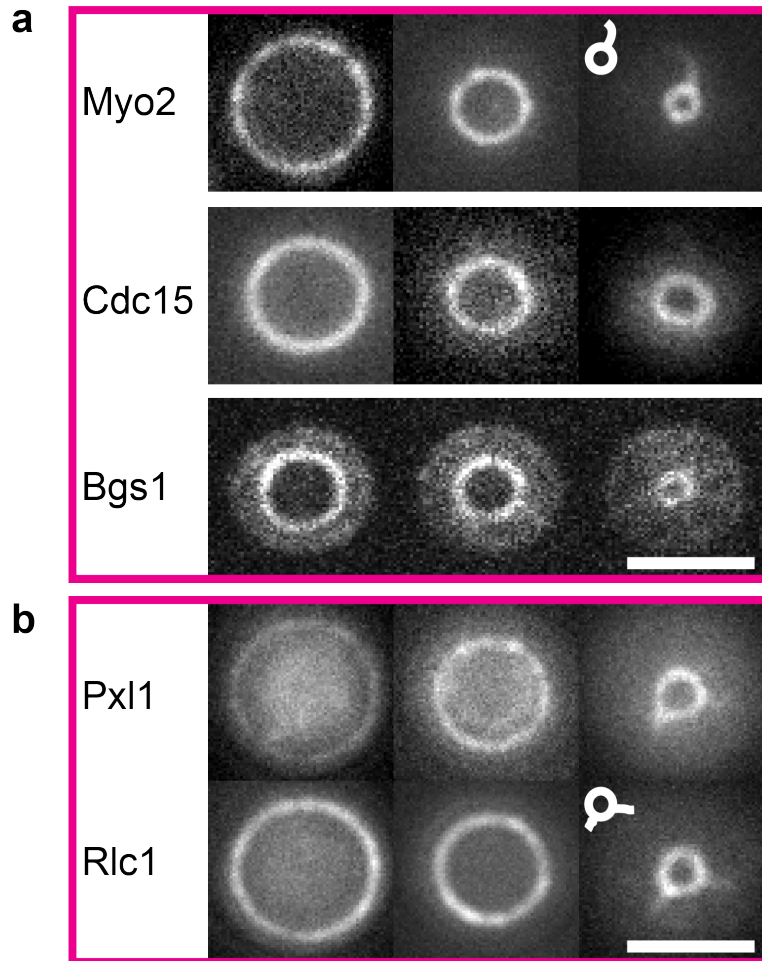

88

89

90 **Supplementary Figure 8. Other cytokinetic ring proteins in fission yeast**

91 **a–b**, Different cytokinetic proteins of fission yeast ring. **a**, Cells labeled with Myo2, Cdc15 and  
 92 Bgs1. **b**, Pxl1 and Rlc1 on the same ring (top/bottom panels). Note the arms depicted in white.  
 93 Scale bar, 2  $\mu$ m.

94



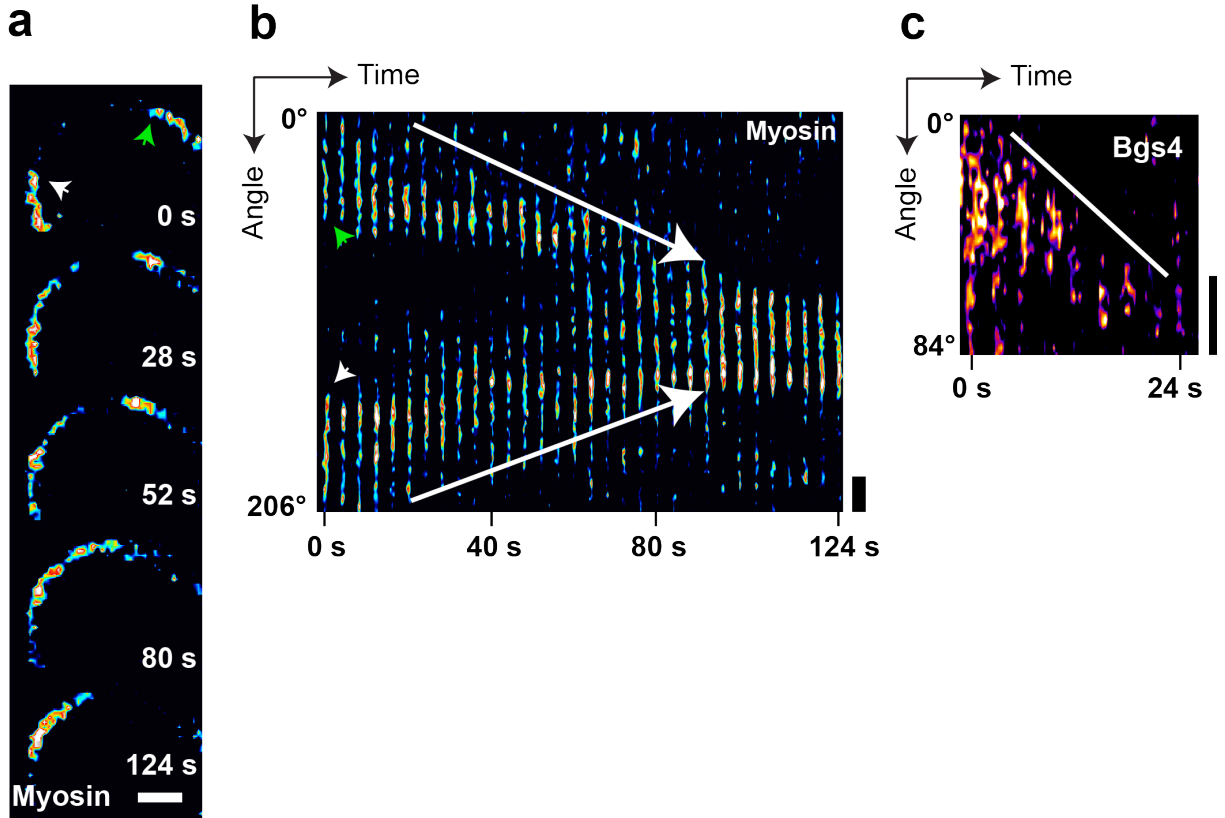

95

96

97 **Supplementary Figure 9. Cluster rotations in fission yeast**

98 **a-b**, Myosin clusters motion in fission yeast (a) and its kymograph after polar transformation (b).

99 Small arrows point to the same clusters in (a) and in (b) at time 0 s, and large arrows in (b)

100 indicate their rotations.

101 **c**, Rotation of a Bgs4 cluster. Scale bars, 2  $\mu\text{m}$ .

102

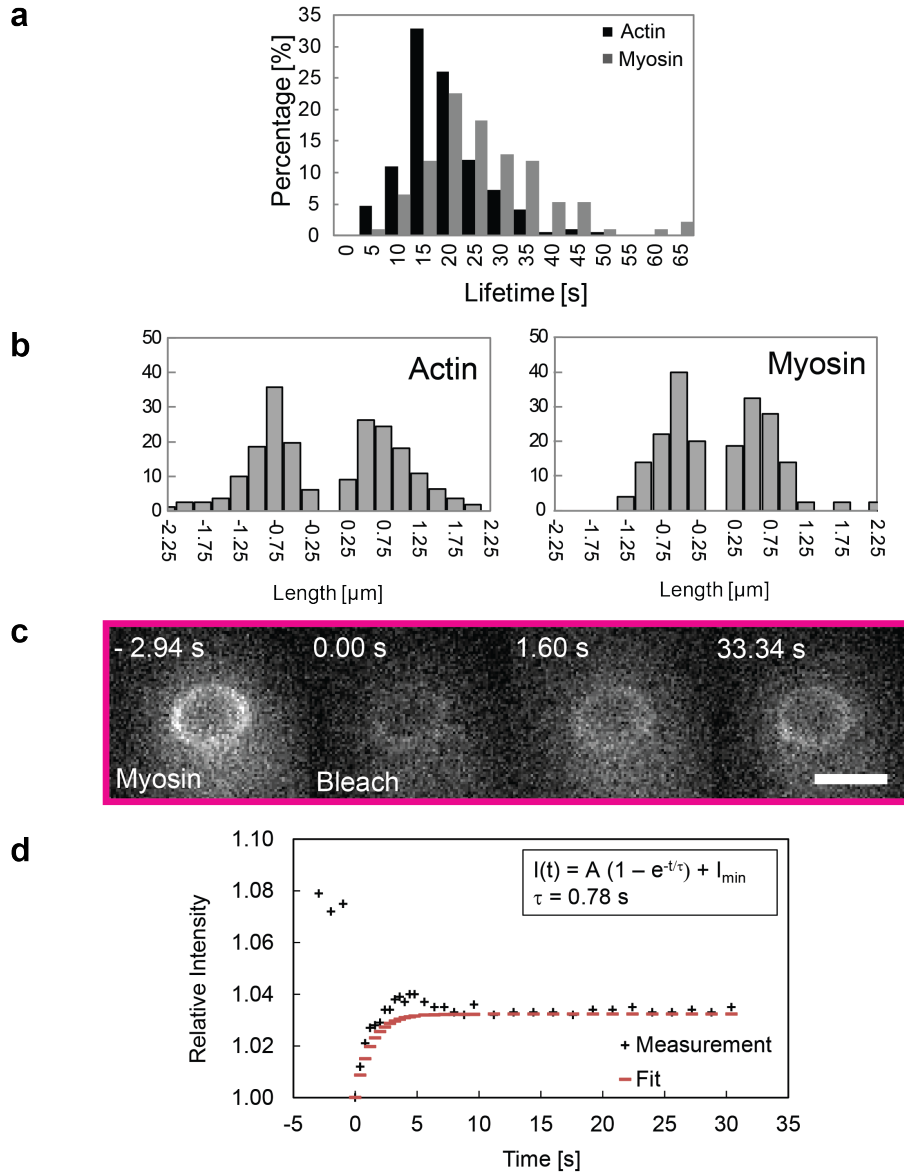

103

104

105 **Supplementary Figure 10. Cluster characteristics and myosin FRAP in fission yeast**

106 **a–b**, Cluster characteristics of fission yeast ring constriction. **a**, Histogram of lifetime of  
 107 clusters. The mean lifetime is 16.4 s (s.d. = 7.7 s, n= 192) for actin and 24.1 s (s.d. = 11.6 s, n=  
 108 93) for myosin. **b**, Distance of cluster movement for cluster rotating clockwise and  
 109 counterclockwise. The mean distance for all actin cluster is 0.72  $\mu\text{m}$  (s.d. = 0.41  $\mu\text{m}$ , n = 192)  
 110 and 0.52  $\mu\text{m}$  (s.d. = 0.34  $\mu\text{m}$ , n = 93) for myosin cluster. **c–d**, FRAP experiment on myosin in the  
 111 fission yeast cytokinetic ring. **c**, The entire ring is bleached, and partially recovers. Scale bar, 2  
 112  $\mu\text{m}$ . **d**, The half time of recovery is  $\sim 1\text{s}$ .

113

- filament (length  $l$ )
- motor position  $s_{mot}$
- stress profile

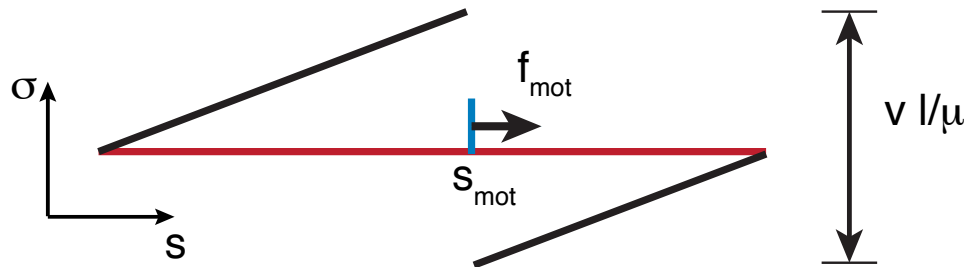

114

115 **Supplementary Figure 11. Illustration of the stress distribution along a stiff slender rod**

116 The rod is of length  $\ell$  (the filament, red) that is drawn by a motor force  $f_{mot}$  at  $s_{mot}$  into the  
 117 direction of the arrow. The filament velocity is  $v$ , its mobility  $\mu$ . The black line indicates the  
 118 stress profile that results from the applied force and the filament friction with the environment.

119

120

121

122

123

124

125

126

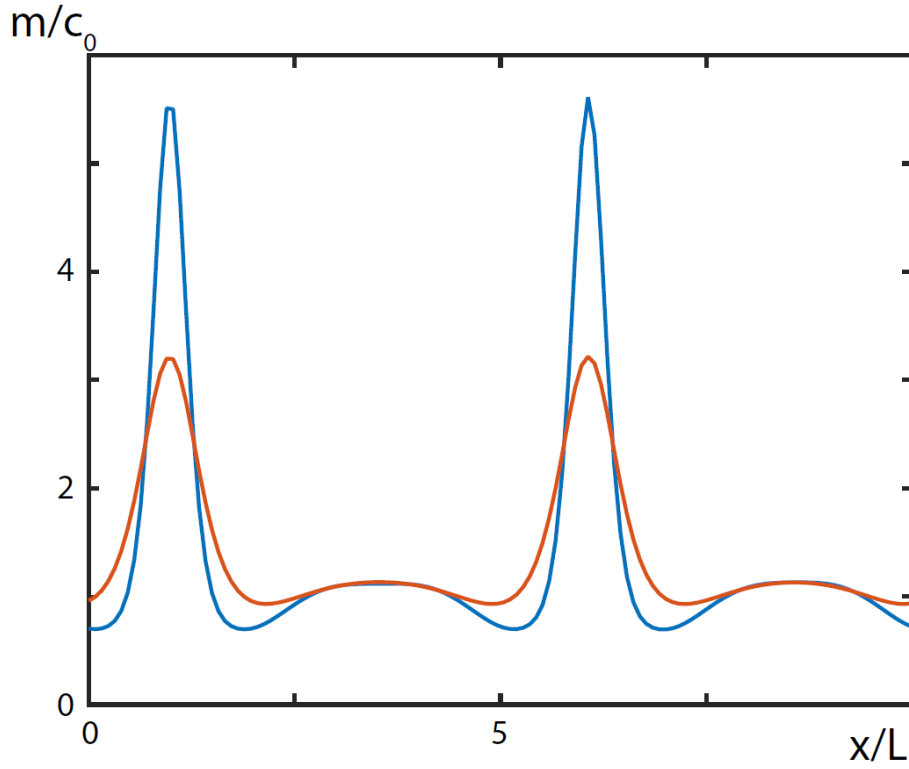

127

128

129 **Supplementary Figure 12. Motor distribution  $m$  for two values of the motor activity  $\alpha$**

130 Blue:  $\alpha = 4\ell\omega_d$ , orange:  $\alpha = 2.5\ell\omega_d$  mimicking the effect of adding blebbistatin. Other

131 parameters: perimeter  $L = 10\ell$ ,  $\beta = 0.1\ell\omega_d$ ,  $\omega_d = 0.2$ ,  $\omega_c = 1$ ,  $v = 2.5\ell\omega_d c_0$ ,  $D = \ell^2\omega_d c_0$ .

132 The total filament number was  $\int dx\{2c_{bp}(x) + c^+(x) + c^-(x)\} = 2Lc_0$ .

133

134

135 **Supplementary Table**136 **Supplementary Table 1: Strain genotypes, markers and sources.**

| <b>Strain</b> | <b>Genotype</b>                                                                                             | <b>Fluorescent markers</b>                                                               | <b>Source / Reference</b> |
|---------------|-------------------------------------------------------------------------------------------------------------|------------------------------------------------------------------------------------------|---------------------------|
| DR 2          | pxl1::kanMX6<br>leu1+::GFPpxl1+ rlc1-<br>mCherry::natR                                                      | Rlc1-mCherry myosin<br>II regulatory light chain<br>GFP-Pxl1 paxillin-like<br>protein    | This study                |
| JW 1110       | h <sup>+</sup> kanMX6-Pmyo2-mYFP-<br>myo2 ade6-M210 leu1-32<br>ura4-D18                                     | Myo2-YFP myosin II<br>heavy chain                                                        | Wu and Pollard,<br>2005   |
| PPG<br>5054   | h <sup>+</sup> pxl1::kanMX6<br>leu1+::GFPpxl1+ leu1-32<br>ura4-D18                                          | GFP-Pxl1 paxillin-like<br>protein Pxl1                                                   | Pinar et al., 2008        |
| JW 977        | h <sup>+</sup> cdc15-mYFP-kanMX6<br>ade6-M210 leu1-32 ura4-D18                                              | Cdc15-YFP<br>membrane-<br>cytoskeletal<br>interactions, F-BAR<br>domains                 | Wu and Pollard,<br>2005   |
| 519           | h <sup>-</sup> bgs1Δ::ura4+ P <sub>bgs1+</sub> ::GFP-<br>bgs1+::leu1+ leu1-32 ura4-<br>D18 his3- Δ1         | GFP-Bgs1 1,3-beta-<br>glucan synthase<br>catalytic subunit Bgs1                          | Cortes et al., 2002       |
| 561           | h <sup>-</sup> bgs4Δ::ura4+ P <sub>bgs4+</sub> ::GFP-<br>bgs4+::leu1+ leu1-32 ura4-<br>D18 his3-Δ1          | GFP-Bgs4 1,3-beta-<br>glucan synthase<br>catalytic subunit Bgs4                          | Pilar Pérez               |
| JW1348        | h <sup>+</sup> nmt41-GFP-CHD (rng2)-<br>leu1 <sup>+</sup> rlc1-mCherry-natMX6<br>ade6-M210 leu1-32 ura4-D18 | Rlc1-mCherry myosin<br>II regulatory light chain<br>CHD-GFP calponin<br>homology domain  | Vavylonis et al.,<br>2008 |
| JW1349        | h <sup>+</sup> nmt41-GFP-CHD (rng2)-<br>leu1+ rlc1-tdTomato natMX6<br>ade6-M210 leu1-32 ura4-D18            | Rlc1-tdTomato myosin<br>II regulatory light chain<br>CHD-GFP calponin<br>homology domain | Vavylonis et al.,<br>2008 |
| JM207         | h <sup>+</sup> rlc1-mCherry::natR ade-<br>leu- ura-                                                         | Rlc1-mCherry myosin<br>II regulatory light chain                                         | James B. Moseley          |
| PN 4461       | h <sup>-</sup> cps1-191 rlc1-GFP::KanR                                                                      | Rlc1-mCherry myosin<br>II regulatory light chain                                         | Nurse lab.<br>collection  |

137

138

139 **Supplementary Note 1**

140

141 MEAN-FIELD MODEL FOR THE DYNAMICS OF ACTIN FILAMENTS IN THE  
142 CONTRACTILE RING

143 In the following, we will give the mathematical details of the physical model used in the main  
144 text.

145 **Model definition**

146 With our theory, we try to capture essential features of the ring dynamics, such as, filament  
147 polarity, rules of interaction between filaments through molecular motors. Consequently, the  
148 final equations of motion describe the behavior of contractile rings independently of many  
149 details of the molecular interaction rules. Still, in the following, we will evoke a specific image  
150 to introduce the dynamic equations.

151 Consider a ring of perimeter  $L$  of actin filaments such that the filaments align with the ring  
152 perimeter. We denote the co-ordinate along the ring perimeter by  $x$  and describe the distribution  
153 of (polar) actin filaments along  $x$  by the densities  $c^+$  for filaments with their plus-end pointing  
154 clockwise and  $c^-$  for filaments of the opposite orientation. Two filaments of opposite orientation  
155 can join their plus-ends forming a bipolar filament (Fig. 4a, (i)). Indirect evidence for such a  
156 process is given by the fusion of nodes observed in fission yeast<sup>2</sup>. While we refrain from  
157 suggesting an explicit molecular mechanism, such bipolar filaments may be formed by motor  
158 clusters linking the filaments. Also actin nucleating proteins of the formin family could be  
159 involved (Figs. 2c and 3b). The distribution of bipolar filaments is denoted by  $c_{bp}$  and gives the  
160 density of their centers. Bipolar filaments form at rate  $\omega_c c^+ c^-$ , bipolar filaments can split into  
161 two filaments of opposite orientations at rate  $\omega_d$  (Fig. 4a, (i)).

162 Actin filaments continuously turn over. In general, they assemble at the barbed end by addition  
163 of actin monomers and disassemble at the pointed end by actin monomer removal or severing.  
164 Assembly and disassembly can be captured by effective rates. These rates depend on the state of  
165 the ends: Capping proteins can inhibit or promote assembly and disassembly. In a minimal  
166 model of the ring dynamics, we refrain from giving a detailed account of filament assembly and  
167 disassembly. Instead we assume that all filaments have a fixed length that is equal to the average  
168 filament length  $\ell$ . Bipolar filaments thus have a length of  $2\ell$  and the total actin density at a point  
169  $x$  is  $\int_0^\ell d\xi \left( c^+(x + \xi) + c_{bp}(x + \xi) + c^-(x - \xi) + c_{bp}(x - \xi) \right)$ . As a crude account of filament  
170 turnover, we will assume that filaments assemble and disassemble at the two ends at the same

171 rate. This leads to an apparent motion of the polar filaments at velocity  $\pm v_{to}$ .

172 Let us now turn to the filament dynamics induced by molecular motors. They can induce relative  
 173 sliding between actin filaments. The corresponding velocities are  $\alpha$  between filaments of the  
 174 same orientations (Fig. 4a, (ii) ) and  $\beta$  for filaments of opposite orientations (Fig. 4a, (iii)). We  
 175 use these parameters to quantify the strength of the motor-mediated filament- filament  
 176 interactions. We assume that motors are located at the filaments' plus-ends, such that  $c^+ + c^- +$   
 177  $c_{bp}$  is the distribution of motors. Finally, fluctuations are accounted for by diffusion terms with  
 178 an effective diffusion constant  $D$ . The corresponding dynamic equations read:

$$\begin{aligned} \partial_t c^+(x) = & D\partial_x^2 c^+(x) - \partial_x \alpha \int_0^\ell d\xi (c^+(x+\xi) - c^+(x-\xi))c^+(x) \\ & - \partial_x \alpha \int_0^\ell d\xi c_{bp}(x+\xi)c^+(x) + \partial_x \beta \int_0^\ell d\xi (c^-(x-\xi) + c_{bp}(x-\xi))c^+(x) \\ & - \partial_x v_{to} c^+(x) - \omega_c c^+(x)c^-(x) + \omega_d c_{bp}(x) \end{aligned}$$

$$\begin{aligned} \partial_t c^-(x) = & D\partial_x^2 c^-(x) - \partial_x \alpha \int_0^\ell d\xi (c^-(x+\xi) - c^-(x-\xi))c^-(x) \\ & + \partial_x \alpha \int_0^\ell d\xi c_{bp}(x-\xi)c^-(x) - \partial_x \beta \int_0^\ell d\xi (c^+(x+\xi) + c_{bp}(x+\xi))c^-(x) \\ & + \partial_x v_{to} c^-(x) - \omega_c c^+(x)c^-(x) + \omega_d c_{bp}(x) \end{aligned}$$

$$\begin{aligned} \partial_t c_{bp}(x) = & D\partial_x^2 c_{bp}(x) - \partial_x \alpha \int_0^\ell d\xi (c_{bp}(x+\xi) - c_{bp}(x-\xi))c_{bp}(x) \\ & - \partial_x \alpha \int_0^\ell d\xi (c^-(x+\xi) - c^+(x-\xi))c_{bp}(x) \\ & - \partial_x \beta \int_0^\ell d\xi (c^+(x+\xi) - c^-(x-\xi))c_{bp}(x) + \omega_c c^+(x)c^-(x) - \omega_d c_{bp}(x) \end{aligned}$$

179 To assist the reader, let us state explicitly the difference of this model to the one discussed in  
 180 Ref.<sup>3</sup>, where the framework used here was developed. The present model extends the former  
 181 work by including the presence of bipolar filaments and processes of their assembly and  
 182 disassembly. Furthermore, in the original formulation<sup>3</sup>, filament assembly and disassembly were  
 183 neglected. Here, we include it in an effective way, by adding the treadmilling currents. That  
 184 treadmilling is an important part of the actin assembly dynamics was shown, for example, in  
 185 Ref.<sup>4</sup>.

186 For numerical solution of the dynamic equations, we used a first-order upwind scheme with  
 187 adaptive time stepping. For the calculation, we have used dimensionless parameters, where time

188 has been scaled by  $(\omega_c c_0)^{-1}$ , length by  $\ell$ , and the filament densities by  $c_0$ , where  $c_0 L$  is the  
 189 number of plus- and of minus-filaments. Consequently,  $v_{to}$  is scaled by  $\ell \omega_c c_0$ ,  $\alpha$  and  $\beta$  by  $\ell \omega_c$ ,  
 190 and  $D$  by  $\ell^2 \omega_c c_0$ .

191 **Mechanism of the instability**

192 First note that the interaction of two bipolar filaments with each other tends to align their centers.  
 193 For a homogenous ring of bipolar filaments, the force on each bipolar filament cancels out. As  
 194 soon as there is a perturbation, locally imbalances are present that will lead to an accumulation of  
 195 bipolar filaments, possibly at different positions along the ring, unless diffusion is dominating  
 196 and smoothing the perturbations. What is the typical distance one can expect between two  
 197 clusters of bipolar filaments? A bipolar filament can interact with all bipolar filaments that are a  
 198 distance  $\ell$  away. These bipolar filaments extend a distance  $2\ell$  from the original filament's  
 199 center, which suggests that the typical distance between two clusters is about  $4\ell$ . This is indeed  
 200 the typical distance we observe after clusters have developed starting from a random perturbation  
 201 of the homogenous state. The typical distance is also affected by the system size (the ring  
 202 perimeter). For  $L = 10\ell$ , which we use in the main text, only two clusters are seen. Note that the  
 203 distances between clusters changes on long time scales, which presumably eventually leads to a  
 204 single remaining cluster for systems of any size. However, this coarsening process takes place on  
 205 such long time scales that it is irrelevant for the dynamics of contractile rings and not further  
 206 discussed here.

207 **Calculation of the stress in the bundle**

208 The stress in the bundle is defined as the sum of the stresses in the individual filaments<sup>3</sup>. Stresses  
 209 in a filament are generated by motors that pull on the filaments and by friction with the  
 210 surrounding medium. Explicitly, force balance on a single filament gives

$$\partial_s \sigma = \frac{1}{\mu} v + f_{mot}.$$

211 In this expression,  $s$  is the co-ordinate along the filament,  $\sigma$  the stress in the filament,  $\mu$  a  
 212 mobility,  $v$  the filament's velocity, and  $f_{mot}$  the force density exerted by motors on the filament.  
 213 Only the effects of motors cross-linking two filaments are accounted for. The stress along a  
 214 filament is thus piece-wise linear in  $s$  with slope  $v/\mu$ , where  $v = \pm\alpha$  or  $v = \pm\beta$  depending on  
 215 the orientation and the relative position of the partner filament, the motor is connected to. If there  
 216 is no motor at a filament end, then the stress vanishes at this point, and the stress jumps by an  
 217 amount  $|v|\ell/\mu$  at the positions  $s_{mot}$ , where motors are bound to the filament, see Fig. S11. The



218 total stress profile along the bundle is then obtained by summing the stress profiles along all  
219 filaments in the bundle. Since the expressions are quite involved, we refrain from giving them  
220 here explicitly.

### 221 **Behavior after addition of blebbistatin**

222 To capture the effect of the myosin inhibitor blebbistatin in our model, we reduced the motor  
223 activity  $\alpha$ , compared to a case leading to a stationary state that corresponds to the pattern in  
224 mammalian rings. For stationary states, the myosin clusters subsequently broadened, see Fig.  
225 S12. This qualitatively agrees with the behavior observed in mammalian rings, see Fig. 2d in the  
226 main text. Similar results have been obtained when instead of  $\alpha$  the values of  $\ell$  and  $v_{to}$  were  
227 reduced to mimic the effects of latrunculin A.

228

229

230

231

## 232 **Supplementary Methods**

233

### 234 **Analysis of rings**

235

236 For mammalian cells, we measured the total and mean fluorescence intensities by tracing the  
237 ring contour with ImageJ. The total and mean intensity were normalized by the total and mean  
238 intensity of the cells at the onset of division ( $t = 0$  s). The normalized values were averaged and  
239 the standard deviation is given by the error bars (Fig. 1 f, g). With intensities extracted from live  
240 samples, we measured the bleaching rate of the cytoplasmic pool of fluorescent proteins, as a  
241 good indicator for bleaching since the recovery times for FRAP at the ring were within seconds.  
242 The results yielded minor corrections for intensity measurements, within 10%. In addition, fixed  
243 samples gave the same measures as live samples, showing that corrections for photobleaching  
244 were not needed.

245 Fission yeast rings can be fitted by a circle. Therefore, we measured the intensities by measuring  
246 the intensity in circles of the dimensions of the outer ring diameter and the inner ring diameter  
247 with ImageJ. The subtraction of these two values gave the total fluorescence intensity of the ring.  
248 By dividing the total intensity by the area of the ring (which is the area of the outer circle minus  
249 the inner circle), we calculated the mean intensity. Since the variations in intensity measures  
250 between individual cells are small in fission yeast cells, we took snapshots of individual cells and  
251 assigned time points to the rings as a function of their diameter. The averaged intensity curve  
252 was then normalized with respect to the intensity value of 3.1  $\mu\text{m}$ . For intensity measurements of  
253 rings before constriction where the diameter is constant we analyzed timelapse movies. We  
254 normalized the intensity with respect to the intensity at a diameter of 3.1  $\mu\text{m}$ . Measurements on  
255 snapshots and timelapses are in agreement and they are plotted in Fig. 1 i, j (timelapse data until  
256 250 s, then data from fixed cells). The standard deviation is given by the error bars (Fig. 1 i, j).

257

258

### 259 **Microfabrication**

260 Polydimethylsiloxane (PDMS) was mixed with its curing agent (Sylgard 184, Dow Corning) in a  
261 10:1 ratio, and the solution allowed to degas for 30 min. A porous membrane filter (pore  
262 diameter 5.0  $\mu\text{m}$ , shiny face up, Millipore Isopore, TMTPO1300) was placed at the bottom of a

263 Petri dish and the sticky side of Scotch tape was applied to the top of the filter<sup>1</sup>. The tape with  
264 the filter was attached to a double sided tape attached to a Petri dish with the filter side exposed  
265 to the air, the PDMS poured onto the filters (non-shiny face up), and the mixture allowed to cure  
266 overnight, followed by 4 h curing at 65°C before the stamp was peeled off.

267 Alternatively the stamp can be fabricated by means of microfabrication (Supplementary Fig. 1)  
268 We used regular arrays of microcavities surfaces prepared using standard lithographic methods  
269 on silicon wafers<sup>5</sup>. Circular patterns on a mask can be transferred to a Si-Wafer. The surface will  
270 contain holes of the size of the wells. PDMS is mixed with curing agent (10:1) and poured on the  
271 wafer. Air bubbles are removed by degassing for 30 min. After 4 h at 65°C the PDMS will be  
272 cured and the stamp can carefully be cut out and peeled of the wafer.

273 The stamp was exposed to a plasma cleaning for 1 min (Harrick Plasma, PDC-32G, high setting  
274 power), followed by a 10 min exposure to Chlorotrimethylsilane 97% (Sigma-Aldrich, C72854,  
275 TMCS) vapor or by the deposition of an anti-adhesive layer (Sigma-Aldrich, SL2 Sigmacote).

276 The liquid degassed PDMS mixture was spread on a glass coverslip #0 (25 mm in diameter,  
277 Fisherbrand) with a Pasteur pipette<sup>5,6</sup>, after its cleaning with a 1 min exposure in the plasma  
278 cleaner. The silanized stamp was then placed onto the PDMS coated coverslip, allowed to cure at  
279 room temperature overnight, followed by four hours curing at 65°C. The stamp was separated  
280 from the coverslips, generating the well pattern on the upper layer of the 30 µm thick elastomer,  
281 using the coverslip as the sealed bottom of the chamber. The overall thickness of the sample  
282 allowed objectives with small working distances and high numerical apertures to be used.

283 We modified the protocol for larger cavities for mammalian cells. The PDMS stamps were  
284 activated with a plasma cleaner and silanized with TMCS as described above. Liquid PDMS was  
285 spin-coated on the molds at 1500 rpm for 30 s. The PDMS was cured for at least 2 h at 65°C. For  
286 plasma binding of the cured PDMS layer to a coverslip (#0), both – the PDMS stamp and the  
287 coverslip – were plasma activated. The thin PDMS layer was then pressed on the coverslip. The  
288 pressure was maintained for several seconds. After about 30 min the PDMS stamp was unpeeled  
289 and the thin PDMS layer containing the microcavities was plasma bound to the coverslip.

290

291

292 **Supplementary References**

293

294

295

296 1 Riveline, D. & Buguin, A. Devices and methods for observing the cell division.  
297 WO/2010/092116 (2009).

298 2 Vavylonis, D., Wu, J. Q., Hao, S., O'Shaughnessy, B. & Pollard, T. D. Assembly  
299 mechanism of the contractile ring for cytokinesis by fission yeast. *Science* **319**, 97-100  
300 (2008).

301 3 Kruse, K. & Julicher, F. Self-organization and mechanical properties of active filament  
302 bundles. *Phys Rev E Stat Nonlin Soft Matter Phys* **67**, 051913 (2003).

303 4 Erlenkamper, C. & Kruse, K. Treadmilling and length distributions of active polar  
304 filaments. *J Chem Phys* **139**, 164907 (2013).

305 5 Balaban, N. Q. *et al.* Force and focal adhesion assembly: a close relationship studied  
306 using elastic micropatterned substrates. *Nat Cell Biol* **3**, 466-472 (2001).

307 6 Riveline, D. *et al.* Focal contacts as mechanosensors: externally applied local mechanical  
308 force induces growth of focal contacts by an mDia1-dependent and ROCK-independent  
309 mechanism. *J Cell Biol* **153**, 1175-1186 (2001).

310

311
